# Supplementary material for: Ferroelectric polyoxometalate-modified nano semiconductor TiO2for increasing electron lifetime and inhibiting electron recombination in dye-sensitized solar cells
Source: Royal Society of Chemistry journal article supplement (doi:10.1039/d0qi00488j), 2020-01-01
Supplement: d0qi00488j1.pdf [file d0qi00488j1.pdf]

Electronic Supplementary Information

**Ferroelectric polyoxometalate modified nano semiconductor TiO<sub>2</sub> for  
increasing electrons lifetime and inhibiting electrons recombination  
in Dye-Sensitized Solar Cells**

Yitong Gu<sup>a</sup>, Ting Wang<sup>a</sup>, Yi-na Dong<sup>b</sup>, He Zhang<sup>a</sup>, Di Wu<sup>a</sup> and Weilin Chen<sup>\*a</sup>

<sup>a</sup>Key Laboratory of Polyoxometalate Science of Ministry of Education Department of Chemistry, Northeast Normal University, Changchun 130024, China.

<sup>b</sup>The Second High School in Mongolian Autonomous County of Qian Gorlos, Songyuan, Jilin 138000

Email: [chenwl@nenu.edu.cn](mailto:chenwl@nenu.edu.cn).

## Table of Contents

|                                                       |    |
|-------------------------------------------------------|----|
| Supplementary Experimental Section .....              | S3 |
| 1. Photoelectrochemical measurements.....             | S3 |
| 2. Material characterizations.....                    | S3 |
| Supplementary Figures.....                            | S4 |
| Fig. S1 IR of Sm.....                                 | S4 |
| Fig. S2 PXRD patterns of Sm.....                      | S4 |
| Fig. S3 UV-vis absorption spectra of Sm.....          | S4 |
| Fig. S4 EDS spectrum of Sm@TiO <sub>2</sub> /P25..... | S5 |

|                                                                                                                                        |    |
|----------------------------------------------------------------------------------------------------------------------------------------|----|
| Fig. S5 J-V curves of DSSCs based on different mass concentrations of Sm@TiO <sub>2</sub> /P25 in the photoanodes.....                 | S5 |
| Fig. S6 OCVD spectra of DSSCs based on different mass concentrations of Sm@TiO <sub>2</sub> /P25 in the photoanodes.....               | S5 |
| Fig. S7 Bode phase diagrams of DSSCs based on different mass concentrations of Sm@TiO <sub>2</sub> /P25 in the photoanodes.....        | S6 |
| Fig. S8 The EIS spectra of DSSCs based on different mass concentrations of Sm@TiO <sub>2</sub> /P25 in the photoanodes.....            | S6 |
| Fig. S9 The photocurrent response of DSSCs based on different mass concentrations of Sm@TiO <sub>2</sub> /P25 in the photoanodes.....  | S6 |
| Fig. S10 The IPCE of DSSCs based on different mass concentrations of Sm@TiO <sub>2</sub> /P25 in the photoanodes.....                  | S7 |
| Fig. S11 Equivalent circuit used to fit the impedance measurements on the DSSCs.....                                                   | S7 |
| Fig. S12 Long-term stability of DSSCs based on 5%Sm@TiO <sub>2</sub> /P25.....                                                         | S7 |
| Fig. S13 Dye-loading texts of TiO <sub>2</sub> and different concentrations of Sm@TiO <sub>2</sub> /P25 films.....                     | S8 |
| Table S1. The corresponding dye-loading values of TiO <sub>2</sub> and different concentrations of Sm@TiO <sub>2</sub> /P25 films..... | S8 |

## **Supplementary Experimental Section**

**Photoelectrochemical measurements:**The photocurrent curve was measured on the CHI601D electrochemical workstation (Shanghai Chenhua Instrument Corp., China) with the solar simulator at room temperature. The Cyclic voltammetry curves were carried out on a CHI601D electrochemical workstation (Shanghai Chenhua Instrument Corp., China) at room temperature by a three-electrode system. Glassy carbon electrode was the working electrode, a standard Ag/AgCl and Pt were reference electrode and counter electrode. The electrolyte was 0.05 mol L<sup>-1</sup>KCl aqueous solution.

**Material characterizations:**Bruker AXS TENSOR-27 FTIR spectrometer by KBr pellets was used to test the IR spectra from 4000 cm<sup>-1</sup> to 400 cm<sup>-1</sup>. The datas of Powder X-ray diffraction (XRD) were acquired on a Bruker AXSD8 Advance diffractometer in a 2θ scope of 5-80° at a rate

of  $10^\circ$  depending on Cu Ka radiation ( $\lambda = 1.5418 \text{ \AA}$ ). Scanning electron microscope (SEM), Energy dispersive X-ray (EDX) and Energy dispersive spectroscopy (EDS) spectrometry Element mapping were completed by means of a FEI Quanta 200F microscope involving a 20 kV speeding up voltage. The Transmission electron microscope (TEM) images were performed with accelerating voltage of 200 kV on a JEOL-2100F transmission electron microscope. The XPS was completed on an ESCALAB 250Xi photoelectronic spectrometer of F-doped SnO<sub>2</sub> glass with an internal reference of C1s photoelectron at 284.6 eV peak and an Al Ka radiation X-ray source. The Uv-vis was tested at the spectral range from 200 nm to 900 nm on an Ultraviolet spectrophotometer of China SP-756P. The photoluminescent spectrum (PL) was carried out on a Hitachi F-4500 fluorescence spectrophotometer.

Supplementary Figures

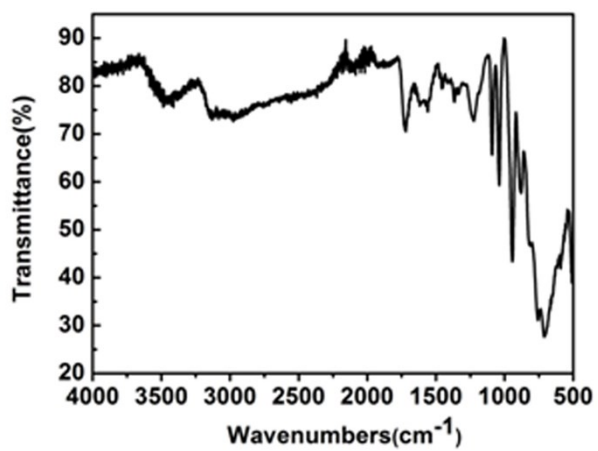

Fig.S1 IR of Sm.

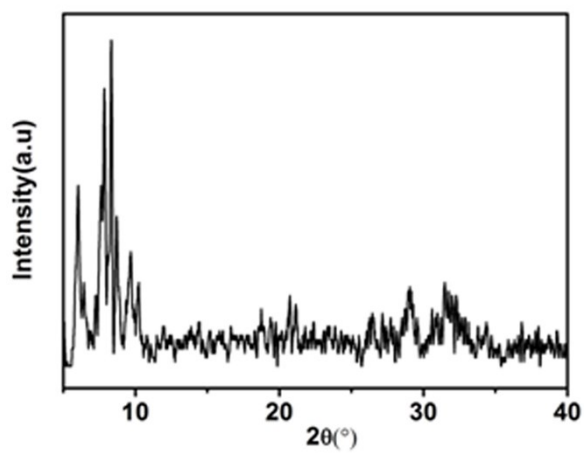

Fig. S2 PXRD patterns of Sm.

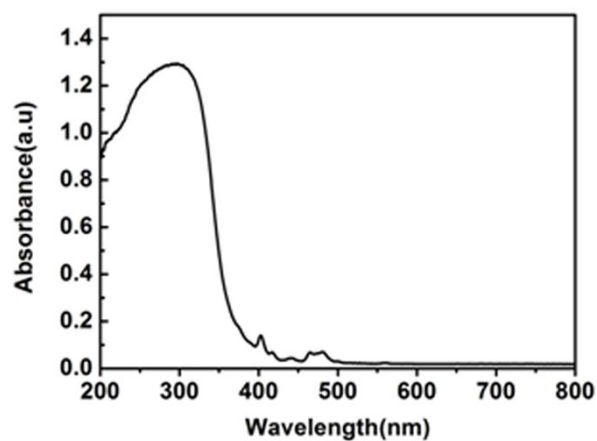

Fig. S3 UV-vis absorption spectra of Sm.

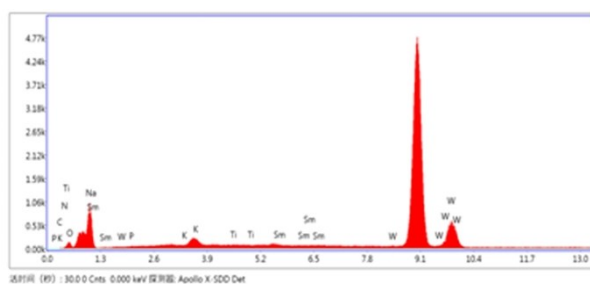

Fig. S4 EDS spectrum of Sm@TiO<sub>2</sub>/P25.

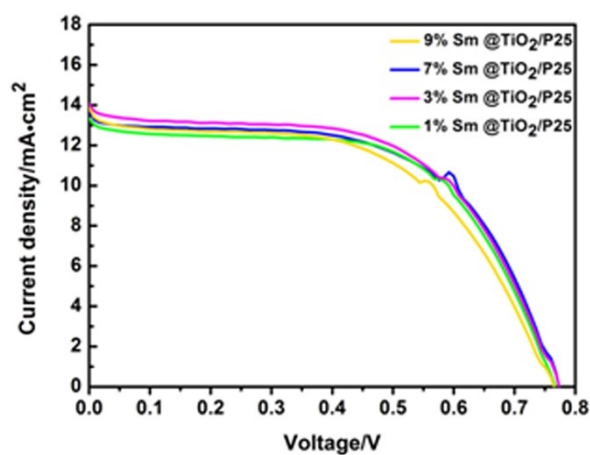

Fig. S5 *J-V* curves of DSSCs based on different mass concentrations of Sm@TiO<sub>2</sub>/P25 in the photoanodes.

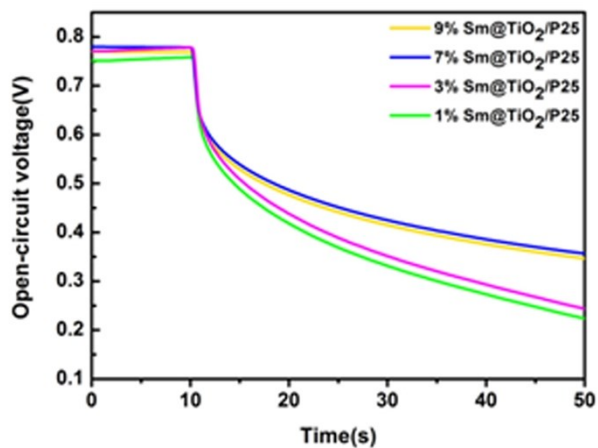

**Fig. S6** OCVD spectra of DSSCs based on different mass concentrations of Sm@TiO<sub>2</sub>/P25 in the photoanodes.

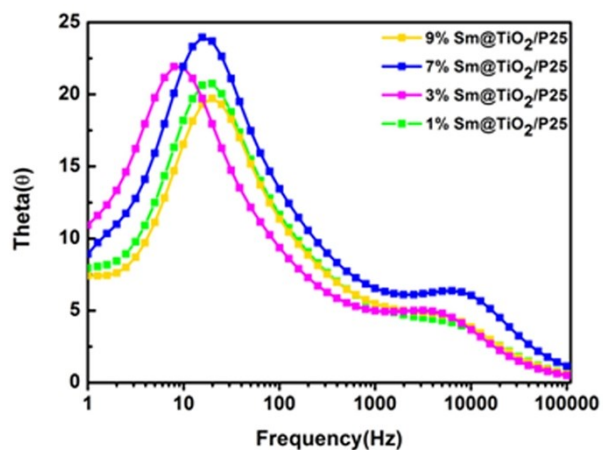

**Fig. S7** Bode phase diagrams of DSSCs based on different mass concentrations of Sm@TiO<sub>2</sub>/P25 in the photoanodes.



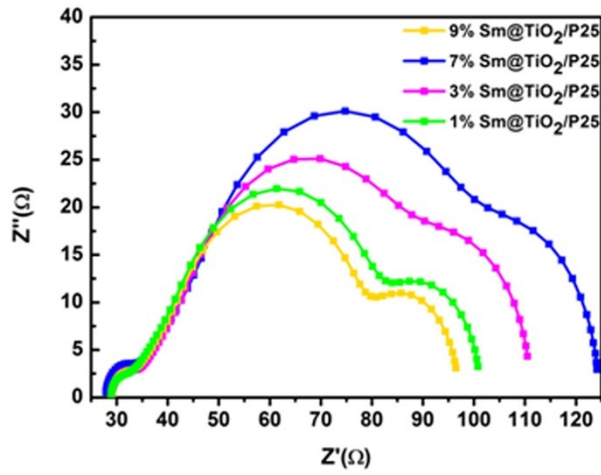

**Fig. S8** The EIS spectra of DSSCs based on different mass concentrations of  $\text{Sm@TiO}_2/\text{P25}$  in the photoanodes.

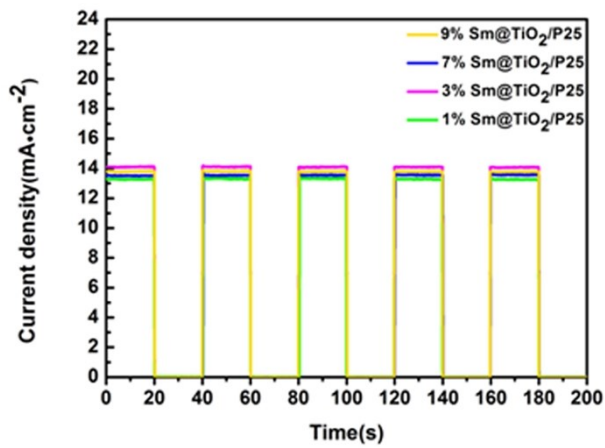

**Fig. S9** The photocurrent response of DSSCs based on different mass concentrations of  $\text{Sm@TiO}_2/\text{P25}$  in the photoanodes.

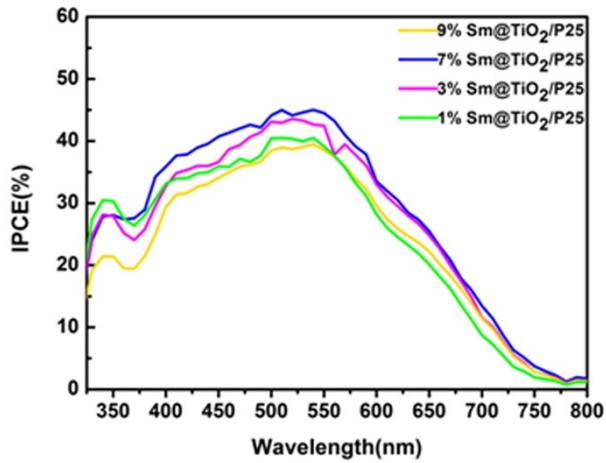

Fig. S10 The IPCE of DSSCs based on different mass concentrations of Sm@TiO<sub>2</sub>/P25 in the photoanodes.

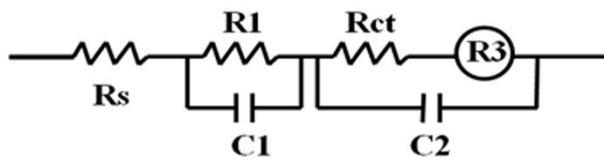

Fig. S11 Equivalent circuit used to fit the impedance measurements on the DSSCs.

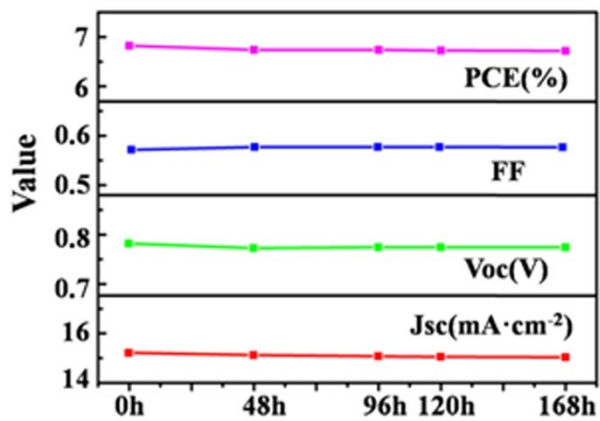

Fig.S12 Long-term stability of DSSCs based on 5%Sm@TiO<sub>2</sub>/P25.

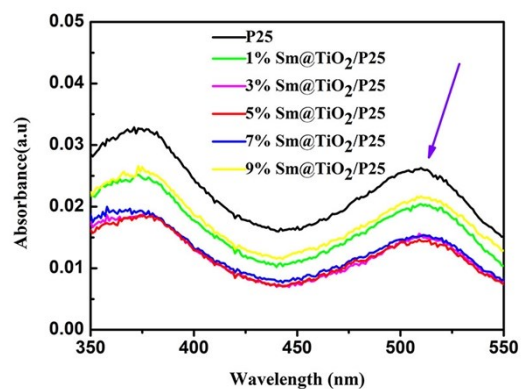

**Fig. S13** UV-vis absorption spectrum of TiO<sub>2</sub> and different concentrations of Sm@TiO<sub>2</sub>/P25 films.

**Table S1** The corresponding dye-loading values of TiO<sub>2</sub> and different concentrations of Sm@TiO<sub>2</sub>/P25 films.

| Samples                     | Dye-loading values / mol  |
|-----------------------------|---------------------------|
| TiO <sub>2</sub>            | 1.862695×10 <sup>-9</sup> |
| 1% Sm@TiO <sub>2</sub> /P25 | 1.447660×10 <sup>-9</sup> |
| 3% Sm@TiO <sub>2</sub> /P25 | 1.105390×10 <sup>-9</sup> |
| 5% Sm@TiO <sub>2</sub> /P25 | 1.041418×10 <sup>-9</sup> |
| 7% Sm@TiO <sub>2</sub> /P25 | 1.091844×10 <sup>-9</sup> |
| 9% Sm@TiO <sub>2</sub> /P25 | 1.536879×10 <sup>-9</sup> |
